# Supplementary material
Source: Springer Nature journal article supplement (https://www.springermedizin.de/resource/supplementary/13058_2012_3162_MOESM3_ESM.pdf/9703394)
Supplement: MOESM3 [file 9703394]

**Table 2: Characteristics of patients tested for germline *BRCA1* and *BRCA2* mutations**

| Characteristics                                                   | Triple Negative<br>n = 110 |       |       |           | Non-Triple Negative<br>n = 321 |       |       |           | p-value   |
|-------------------------------------------------------------------|----------------------------|-------|-------|-----------|--------------------------------|-------|-------|-----------|-----------|
|                                                                   | n                          | BRCA1 | BRCA2 | BRCA (%)  | n                              | BRCA1 | BRCA2 | BRCA (%)  |           |
| <b>With Family History</b>                                        |                            |       |       |           |                                |       |       |           |           |
| Early onset, ≤ 35 years old                                       | 6                          | 4     | 0     | 4 (66.7)  | 29                             | 3     | 4     | 7 (24.1)  | 0.063 †   |
| > 35 years old                                                    | 32                         | 9     | 3     | 12 (37.5) | 161                            | 7     | 13    | 20 (12.4) | 0.0005 *  |
| Overall                                                           | 38                         | 13    | 3     | 16 (42.1) | 190                            | 10    | 17    | 27 (14.2) | <0.0001 * |
| <b>Without Family History</b>                                     |                            |       |       |           |                                |       |       |           |           |
| Early onset, ≤ 35 years old                                       | 25                         | 7     | 0     | 7 (28.0)  | 71                             | 3     | 4     | 7 (9.9)   | 0.045 †   |
| 36 - 50 years old                                                 | 47                         | 3     | 1     | 4 (8.5)   | 60                             | 1     | 3     | 4 (6.7)   | 1.000 †   |
| Overall                                                           | 72                         | 10    | 1     | 11 (15.3) | 131                            | 4     | 7     | 11 (8.4)  | 0.131 *   |
| <b>All, regardless of family history or age</b>                   | 110                        | 23    | 4     | 27 (24.5) | 321                            | 14    | 24    | 38 (11.8) | 0.001 *   |
| <b>Mean age at diagnosis</b>                                      | 40.6                       |       |       |           | 42.0                           |       |       |           | 0.172     |
| <b>Mean no of 1° relatives</b>                                    | 7.2                        |       |       |           | 7.1                            |       |       |           | 0.827     |
| <b>Mean no of affected (breast or ovarian) relatives 1° or 2°</b> | 0.6                        |       |       |           | 0.8                            |       |       |           | 0.003     |
| <b>Prevalence of BRCA1 mutations</b>                              |                            | 20.9% |       |           |                                | 4.4%  |       |           | <0.0001*  |
| <b>Prevalence of BRCA2 mutations</b>                              |                            |       | 3.6%  |           |                                |       | 7.5%  |           | 0.158*    |

\* Chi-square Test

† Fisher's Exact Test

Table 2 shows the prevalence of germline mutations in BRCA1 and BRCA2 (combined) in the 431 breast cancer patients analysed, of whom 110 developed triple negative breast cancer and 321 did not. Family history includes presence of breast or ovarian cancer in 1° and 2° relatives, bilateral breast cancer in the index patient or relative, or breast and ovarian cancer in the same individual in the index patient or relative. P-values were calculated using Fisher's Exact or Chi-Square Test and mean values were calculated using independent t test
